# Supplementary material
Source: PubMed Central journal article supplement (PMC4135473)
Supplement: NIHMS372346-supplement-Supplement.pdf [file NIHMS372346-supplement-Supplement.pdf]

## ONLINE DATA SUPPLEMENT

Association between obstructive lung disease and markers of HIV infection in a high risk cohort

M. Bradley Drummond, Gregory D. Kirk, Jacquie Astemborski, Mariah M. Marshall, Shruti H. Mehta, John F. McDyer, Robert H. Brown, Robert A. Wise and Christian A. Merlo

| Characteristic                    | Adjusted Odds Ratio (95% CI)* | P-value |
|-----------------------------------|-------------------------------|---------|
| Age (per 10 years)                | 0.96 (0.76-1.21)              | 0.73    |
| Black race                        | 0.71 (0.41-1.20)              | 0.20    |
| BMI category (kg/m <sup>2</sup> ) |                               |         |
| <21                               | Reference                     |         |
| 21-27                             | 0.92 (0.58-1.48)              |         |
| >27                               | 0.59 (0.35-1.00)              | 0.02    |
| Heavy smoking <sup>†</sup>        | 1.72 (1.12-2.64)              | 0.01    |
| History of bacterial pneumonia    | 1.97 (1.23-3.14)              | 0.005   |
| HIV status                        |                               |         |
| Negative                          | Reference                     |         |
| Positive, VL<200,000 copies/mL    | 0.80 (0.53-1.20)              |         |
| Positive, VL≥200,000 copies/mL    | 3.08 (1.14-8.32)              | 0.85    |

\*Adjusted for other variables in the table as well as gender and current injection drug use. <sup>†</sup>≥40 pack-year vs <40 pack-years smoking. OLD= Obstructive lung disease; LLN= Lower limit of normal; 95%CI= 95% confidence interval; BMI= Body mass index. HIV= Human immunodeficiency virus; VL= Viral load.

| Characteristic                                   | Adjusted Odds Ratio (95% CI)* | P-value |
|--------------------------------------------------|-------------------------------|---------|
| Age (per 10 years)                               | 1.07 (0.64-1.77)              | 0.80    |
| Black race                                       | 0.39 (0.12-1.30)              | 0.02    |
| BMI category (kg/m <sup>2</sup> )                |                               |         |
| <21                                              | Reference                     |         |
| 21-27                                            | 0.74 (0.33-1.66)              |         |
| >27                                              | 0.71 (0.28-1.77)              | 0.48    |
| Heavy smoking <sup>†</sup>                       | 1.41 (0.62-3.17)              | 0.41    |
| History of bacterial pneumonia                   | 1.84 (0.92-3.69)              | 0.08    |
| Antiretroviral use                               | 0.62 (0.31-1.24)              | 0.18    |
| VL≥200,000 copies/mL vs.<br>VL<200,000 copies/mL | 3.79 (1.33-10.8)              | 0.01    |

\*Adjusted for other variables in the table as well as current injection drug use and gender. <sup>†</sup>≥40 pack-year smoking versus <40 pack-years smoking. LLN= Lower limit of normal; 95%CI= 95% confidence interval; BMI= Body mass index. HIV= Human immunodeficiency virus; VL= Viral load.
